# Supplementary material for: Barriers to operational flood forecasting in complex terrain: from precipitation forecasts to probabilistic flood forecast mapping at short lead times
Source: Copernicus journal article supplement (doi:10.5194/egusphere-2023-2088), 2023-10-09
Supplement: Supplementary file 1 [file egusphere-2023-2088-supplement.pdf]

QPE

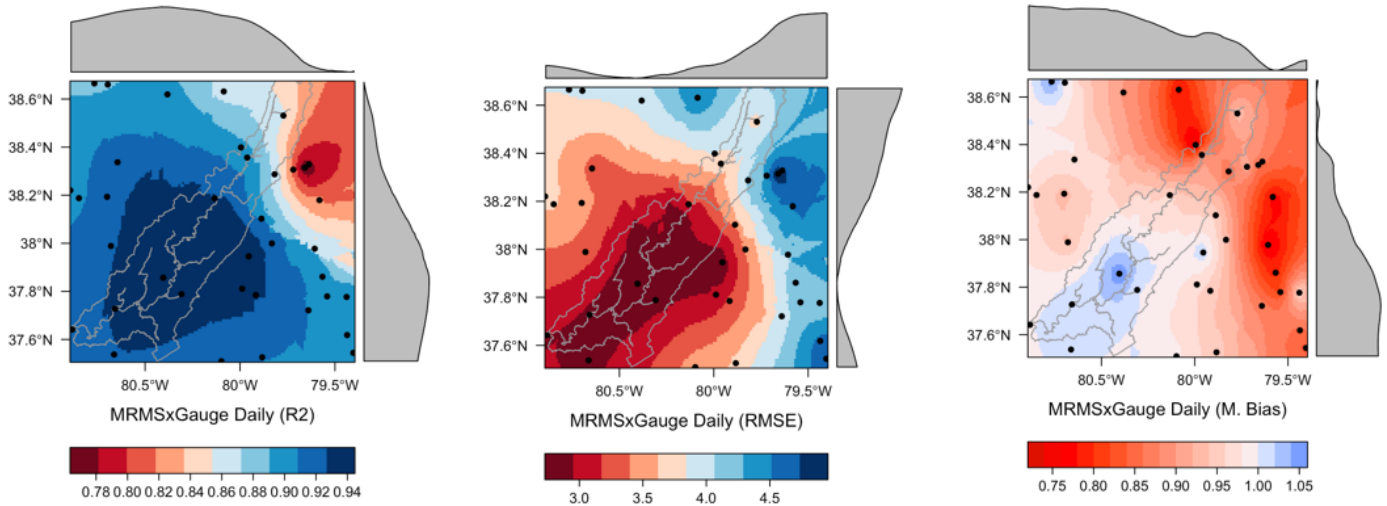

Figure 1S: (a) Pearson Correlation, (b) Root Mean Squared Error and (c) Multiplicative bias against MRMS and daily accumulated rain gauges time-series between 05/2015 and 03/2020.

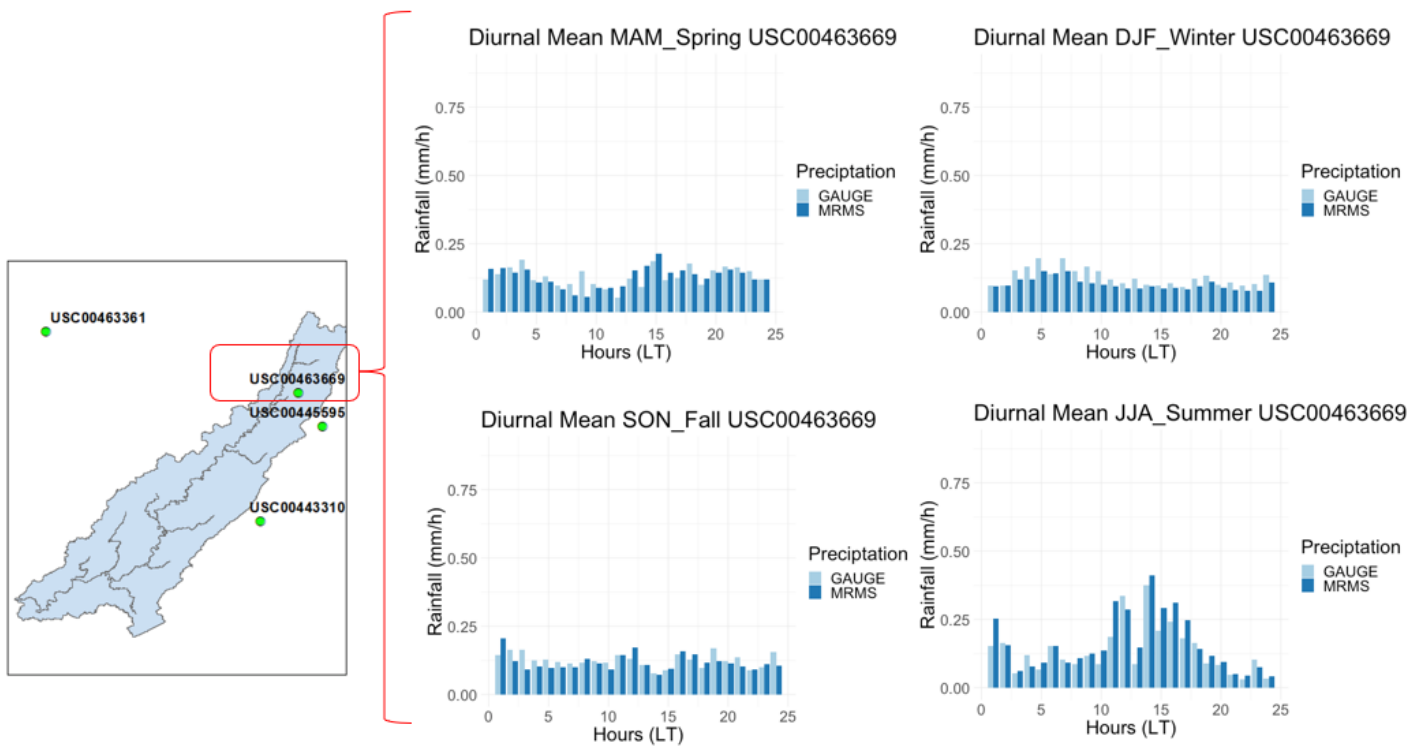

Figure 2S: Diurnal cycle of precipitation considering the available hourly rain gauge inside the basin and MRMS grid point between for different season groups between 05/2015 and 03/2020. (a) spring (b) winter (c)fall and (d) summer.

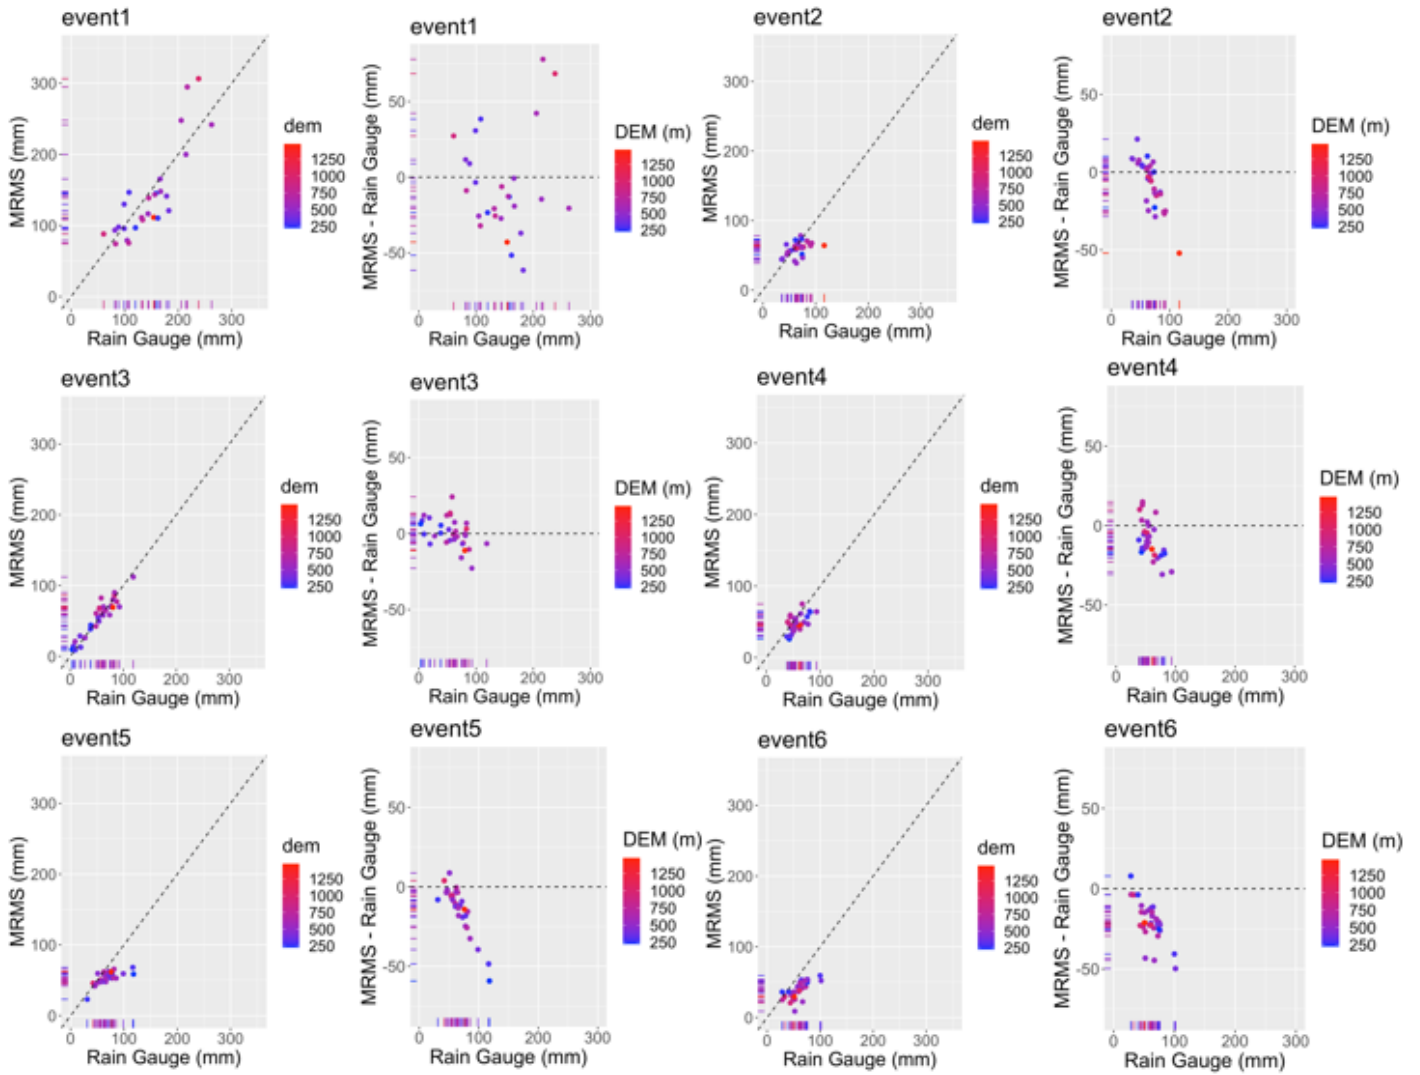

Figure 3S: Hourly comparison between mean rain gauge value and MRMS pixels averaged among the 4 rain gauges sites.

# QPF Evaluation

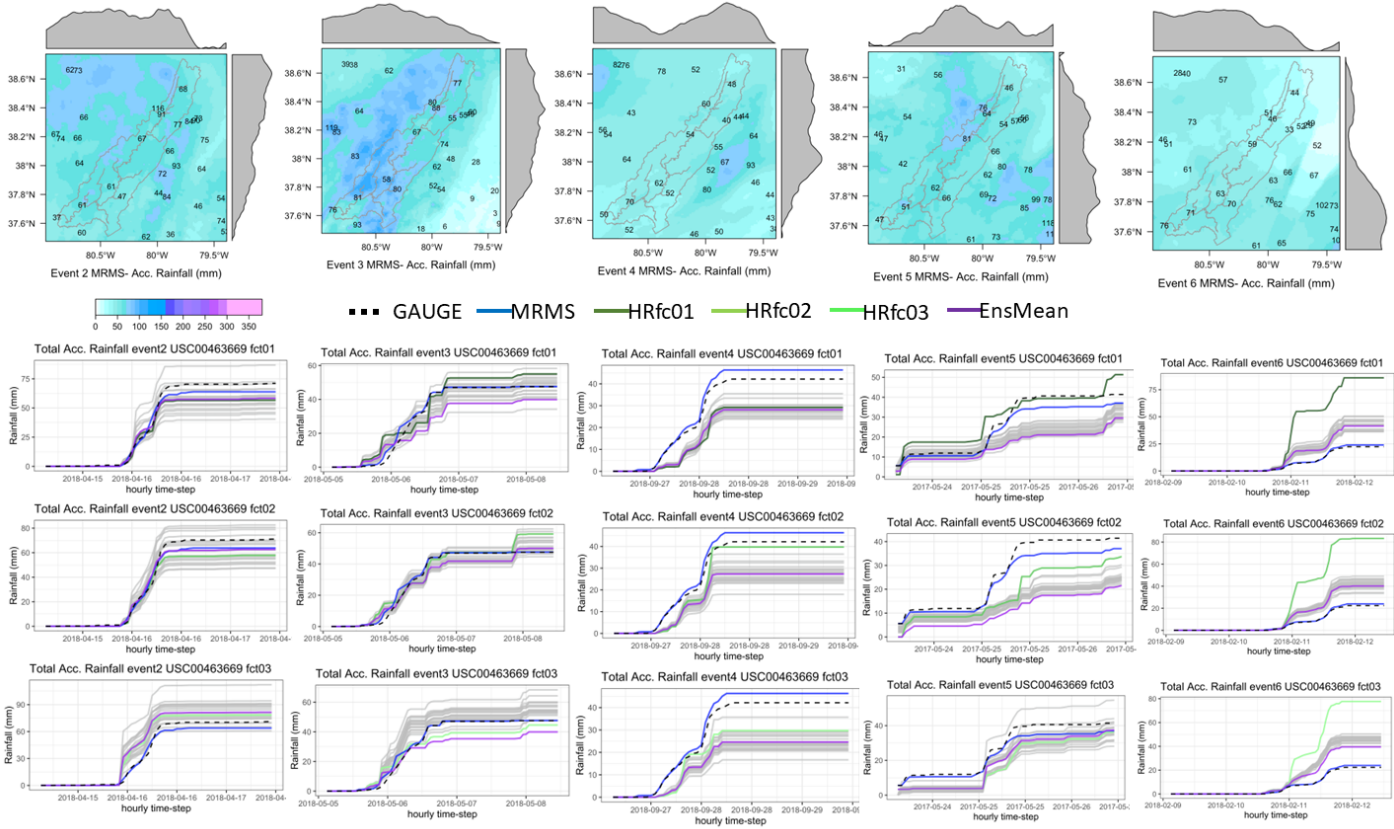

Figure 4S: Total accumulated rainfall for the remaining 5 extreme events analyzed in this study.

# WRF-Hydro Calibration

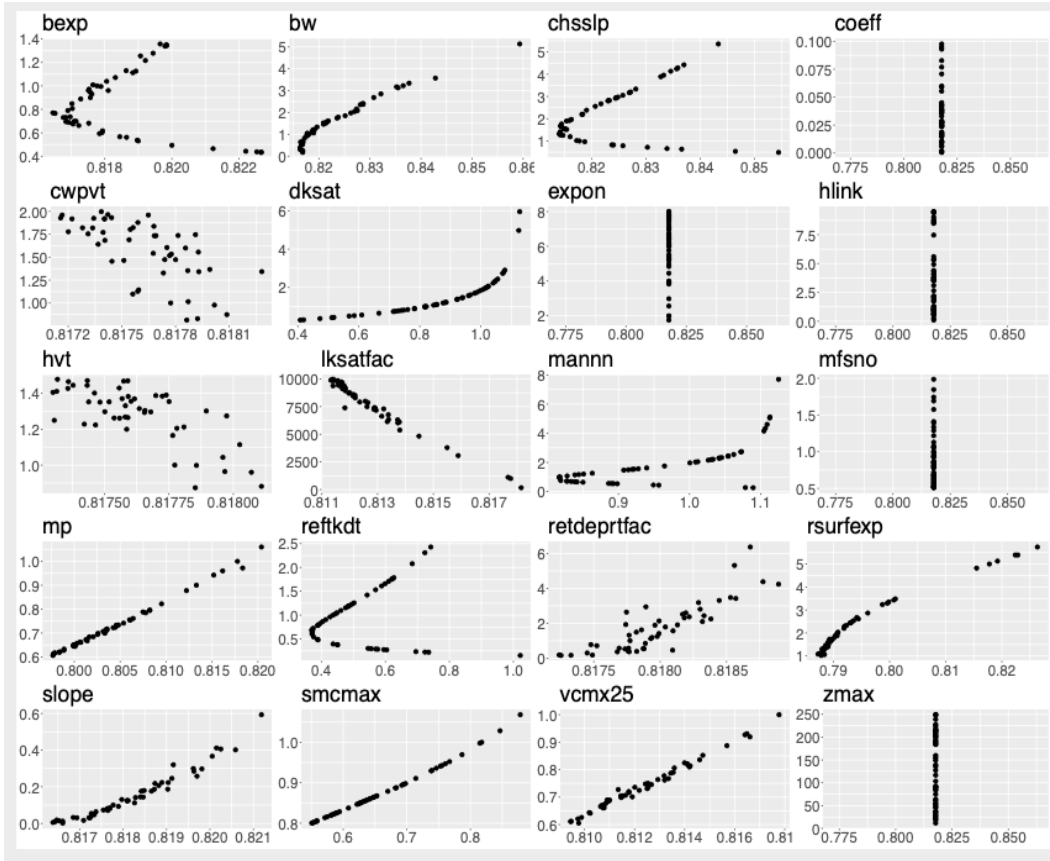

Figure 5S: Local sensitivity analysis (x axis; variation of one parameter at each time) of Noah-MP parameters during 50 DDS iterations considering the optimum NSE value (y axis).

Table 2: LSM parameters table with ranges and initial values for DDS iterations. NWM, Default and Calibrated are the spatial average values over the basin domain.

| Parameter          | Factor Type    | Min    | Max   | Initial | NWM      | Default  | Calibrated |
|--------------------|----------------|--------|-------|---------|----------|----------|------------|
| <u>bexp</u>        | multiplicative | 0.4    | 1.9   | 1       | 6.020    | 5.249    | 5.664      |
| <u>smcmax</u>      | multiplicative | 0.5    | 1.5   | 1       | 0.484    | 0.463    | 0.188      |
| <u>dksat</u>       | multiplicative | 0.1    | 1000  | 10      | 9.39E-06 | 3.30E-06 | 2.35E-06   |
| <u>lksat</u>       | multiplicative | 0.2    | 1000  | 10      | 9.39E-06 | 3.30E-06 | 2.35E-06   |
| <u>refkdt</u>      | substitutive   | 0.1    | 4     | 0.4     | 0.399    | 3.000    | 0.318      |
| <u>slope</u>       | substitutive   | 0      | 1     | 0.1     | 0.082    | 0.100    | 0.017      |
| <u>retdeprtfac</u> | substitutive   | 0.1    | 10000 | 7000    | 7490.832 | 1.000    | 3.654      |
| <u>lksatfac</u>    | multiplicative | 1      | 10000 | 7       | 7609.401 | 1000.000 | 3821.044   |
| <u>zmax</u>        | substitutive   | 0      | 250   | 140     | 143.506  | 50.000   | 38.818     |
| <u>expon</u>       | substitutive   | 1      | 8     | 3.6     | 3.624    | 3.000    | 3.304      |
| <u>coeff</u>       | substitutive   | 0.0001 | 2     | 1       | 1.000    | 1.000    | 0.038      |
| <u>cwpvt</u>       | multiplicative | 0.5    | 2     | 1.2     | 0.311    | 0.180    | 0.180      |
| <u>vcmx25</u>      | multiplicative | 0.6    | 1.4   | 0.8     | 60.990   | 75.582   | 48.725     |
| <u>mp</u>          | multiplicative | 0.6    | 1.4   | 1.2     | 9.396    | 8.939    | 8.939      |
| <u>hvt</u>         | multiplicative | 0.25   | 10    | 6       | 15.400   | 2.624    | 2.624      |
| <u>mfsno</u>       | multiplicative | 0.3    | 2     | 0.4     | 1.104    | 2.500    | 2.500      |
| <u>rsurfexp</u>    | substitutive   | 1      | 6     | 2.5     | 2.417    | 5.000    | 4.559      |

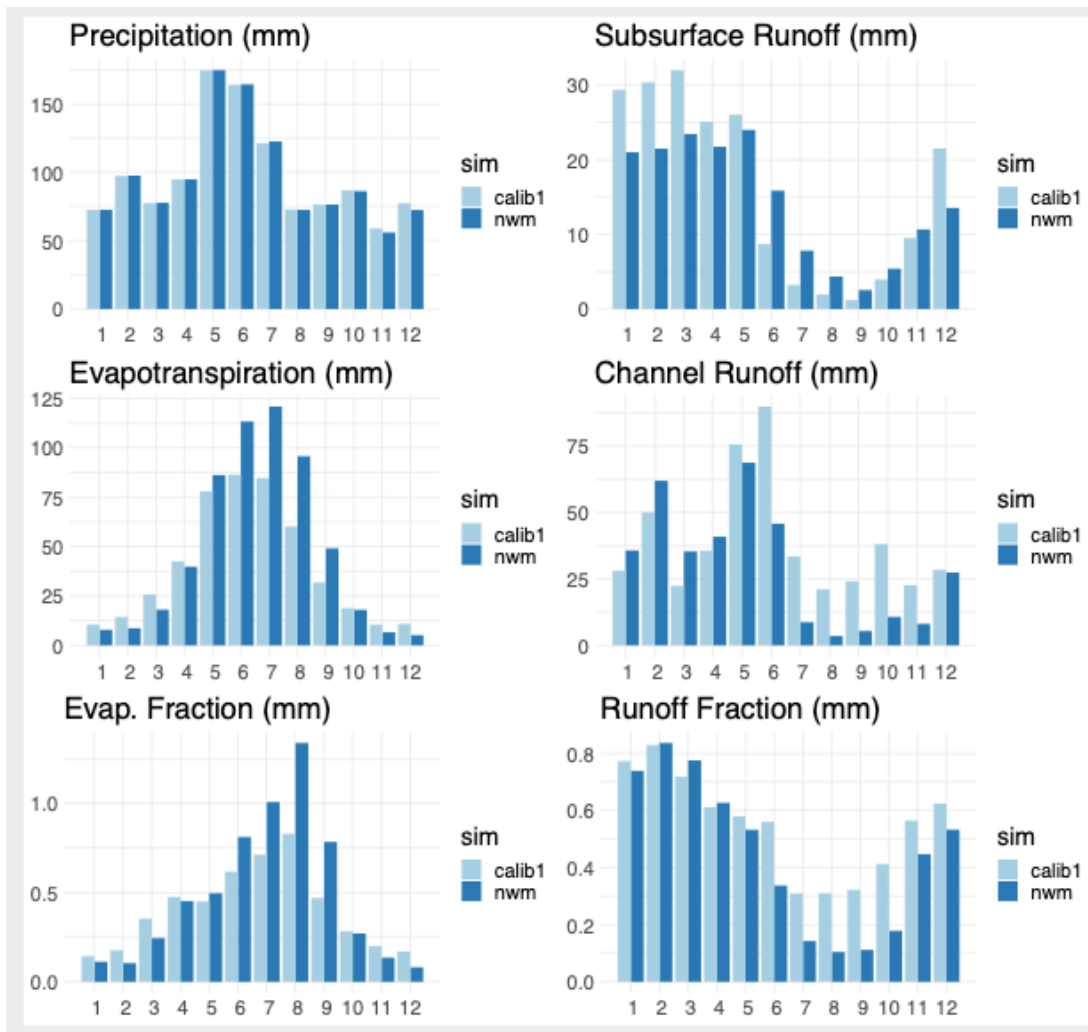

Figure 6S: Comparison of water budget components between the calibrated WRF-Hydro gridded and parameters obtained from the NWM version 2.0. The x axis represent the average for each month between 05/2015 and 12/2019. Channel runoff represents the mean lateral flow entering the channel over the basin area.

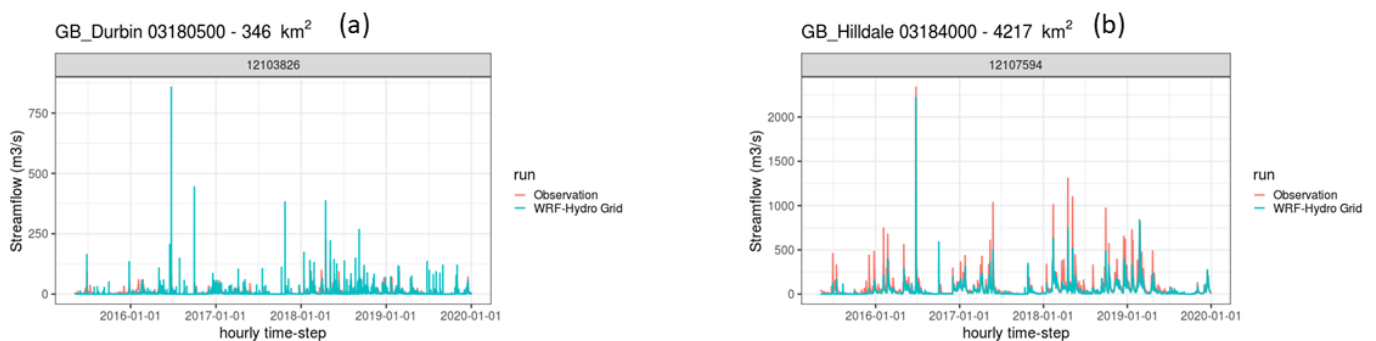

Figure 6Sb: Hydrographs using the NWM version 2.0 calibrated parameters for (a) Durbin (NSE=-0.25,  $r^2=0.35$ , bias=-4.89) and (b) Hilldale (NSE=0.71,  $r^2=0.89$ , bias = -36.9). The statistics were calculated using the package *rwrhydro*.



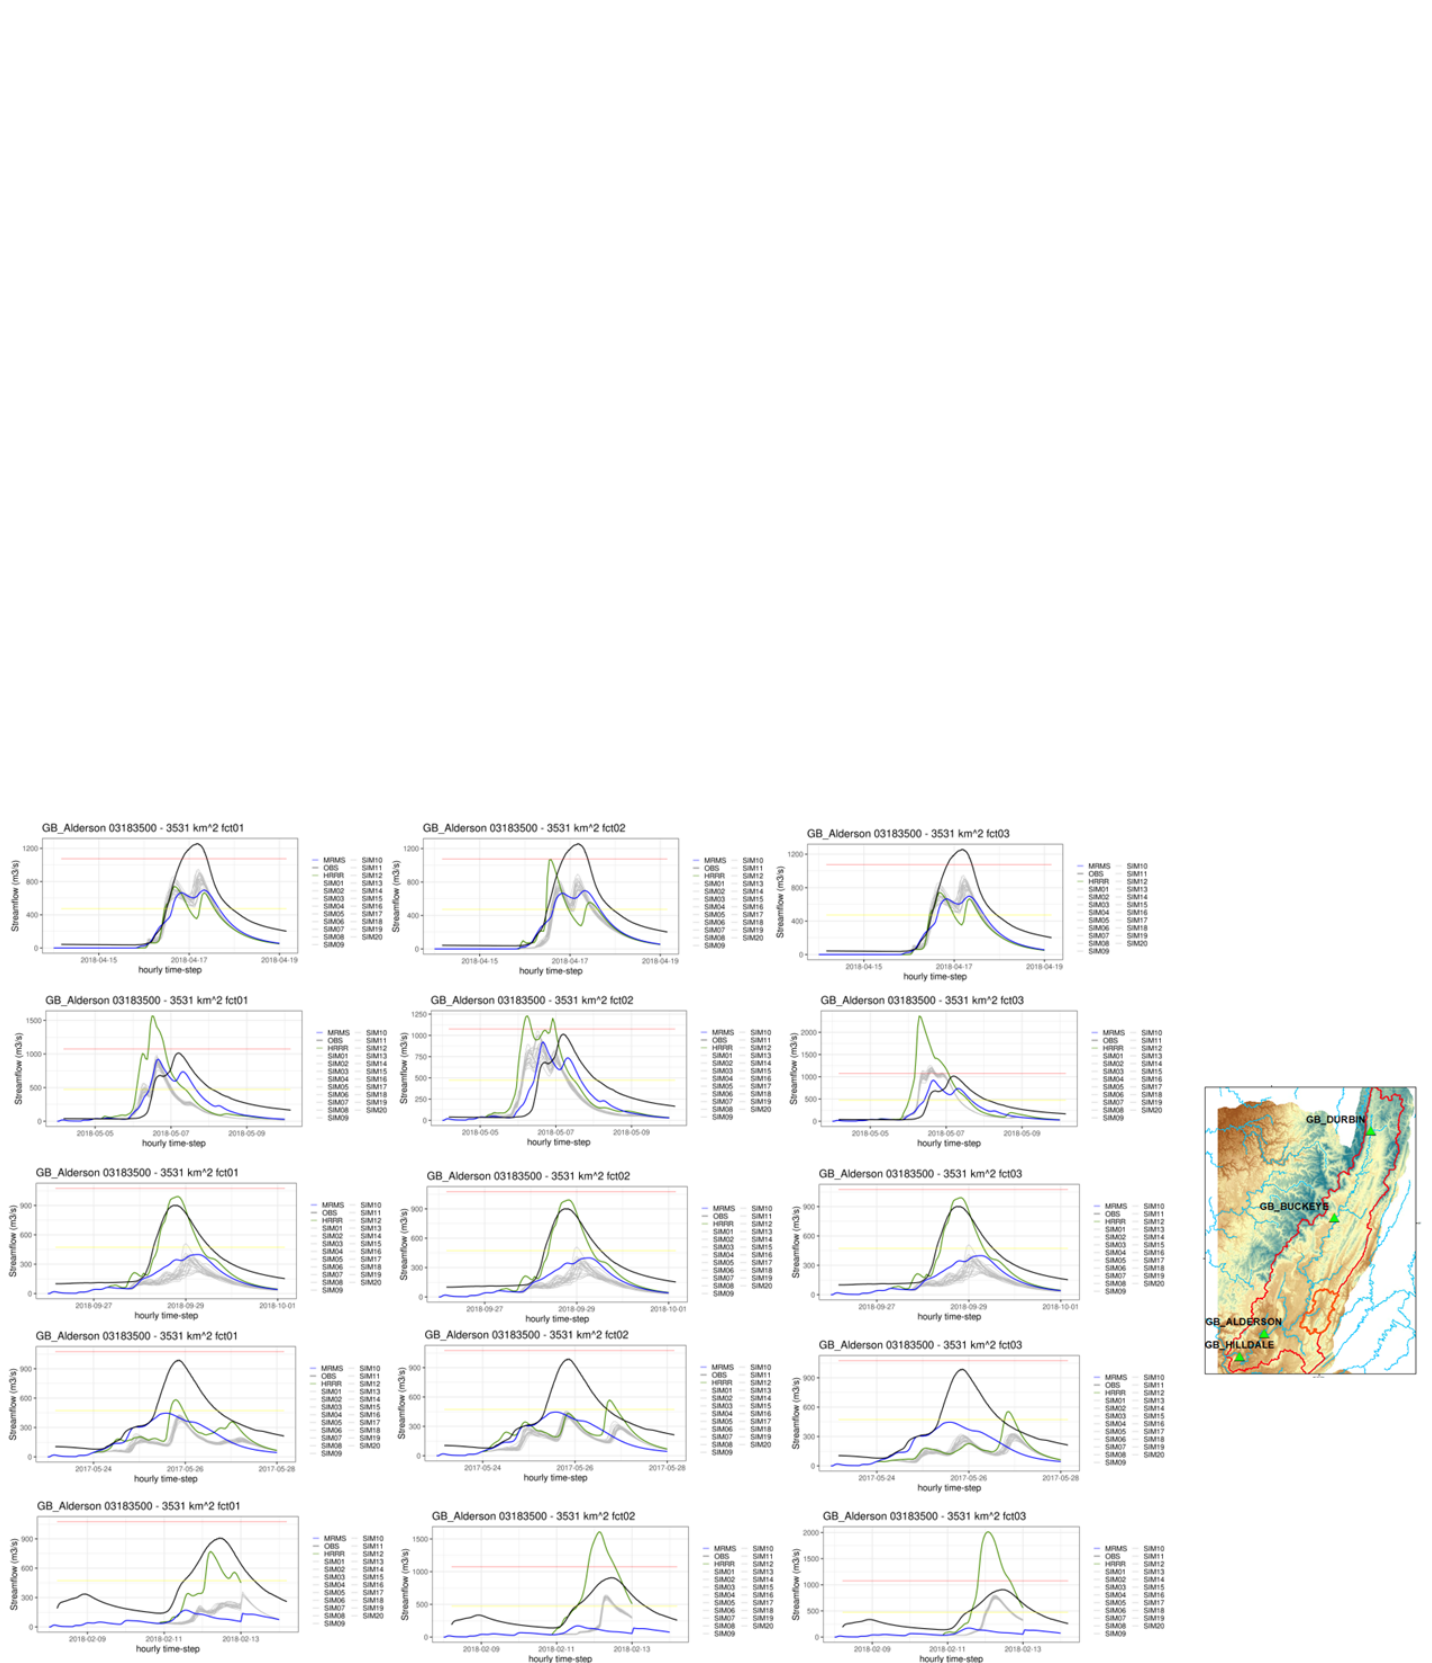

Figure 7S: Streamflow simulations for the remaining 5 events analyzed. Each row represents a flood event, and each column is the corresponding forecast lead-time up to 3 hours.
